# Supplementary material
Source: PubMed Central journal article supplement (PMC10169426)
Supplement: awac129_supplementary_data.pdf [file awac129_supplementary_data.pdf]

**Supplementary material for Wilson et al., 'Recovery from aphasia in the first year after stroke'**

**Supplementary Table 1** Initial QAB overall: model parameters

| Variable         | Estimate    | SE       | <i>t</i> |
|------------------|-------------|----------|----------|
| Intercept        | 9.792       | 0.849    | 11.54    |
| Location NA      | [Reference] |          |          |
| Location F-      | -1.059      | 0.519    | -2.04    |
| Location F+d     | -2.916      | 0.752    | -3.88    |
| Location F+v     | -3.960      | 0.756    | -5.25    |
| Location FTP     | -3.401      | 1.012    | -3.36    |
| Location TP-     | -0.6251     | 0.566    | -1.10    |
| Location TP+     | -3.552      | 0.777    | -4.57    |
| Location P       | 0.0512      | 0.605    | 0.08     |
| Location VT      | -0.160      | 0.574    | -0.28    |
| Location BG      | -0.147      | 0.442    | -0.33    |
| Location Th      | -0.224      | 0.517    | -0.43    |
| Location M       | -0.175      | 0.680    | -0.26    |
| Location O       | 1.192       | 0.610    | 1.95     |
| Location R       | 0.861       | 0.635    | 1.36     |
| Extent           | -0.036      | 0.008    | -4.52    |
| Extent^2         | 6.83e-05    | 2.57e-05 | 2.66     |
| Stroke type (H)  | -0.968      | 0.304    | -3.18    |
| Age              | -0.030      | 0.008    | -3.68    |
| Sex (F)          | 0.247       | 0.228    | 1.08     |
| Handedness (L/A) | 0.376       | 0.351    | 1.07     |
| Education        | 0.050       | 0.039    | 1.30     |

Dependent variable: Initial QAB overall

Number of observations: 332

Error degrees of freedom: 311

**Supplementary Table 2** Models of initial domain-specific subscores

|                                 | WC     | SC     | WF     | GC     | PE     | SMP    | SME    | R      |
|---------------------------------|--------|--------|--------|--------|--------|--------|--------|--------|
| Full model $r^2$                | 46.0%  | 46.8%  | 57.4%  | 54.1%  | 42.3%  | 43.7%  | 22.7%  | 55.5%  |
| Lesion location ( $p$ )         | <.0001 | <.0001 | <.0001 | <.0001 | <.0001 | <.0001 | <.0001 | .0024  |
| Lesion extent ( $p$ )           | .0006  | .066   | <.0001 | <.0001 | .0008  | <.0001 | .0052  | <.0001 |
| Lesion loc/ext ( $\Delta r^2$ ) | 41.6%  | 37.4%  | 53.7%  | 50.7%  | 37.9%  | 41.6%  | 20.1%  | 51.2%  |
| Stroke type ( $p$ )             | .033   | .45    | .0086  | .11    | .66    | .42    | .97    | .012   |
| Stroke type ( $\Delta r^2$ )    | 0.8%   | —      | 0.9%   | —      | —      | —      | —      | 0.9%   |
| Age ( $p$ )                     | <.0001 | <.0001 | <.0001 | .040   | .0024  | .95    | .055   | .0022  |
| Age ( $\Delta r^2$ )            | 4.0%   | 4.9%   | 2.6%   | 0.6%   | 2.0%   | —      | —      | 1.4%   |
| Sex ( $p$ )                     | .39    | .0072  | .11    | .35    | .049   | .18    | .0096  | .17    |
| Sex ( $\Delta r^2$ )            | —      | 1.2%   | —      | —      | 0.8%   | —      | 1.7%   | —      |
| Handedness ( $p$ )              | .37    | .84    | .39    | .016   | .93    | .55    | .98    | .29    |
| Handedness ( $\Delta r^2$ )     | —      | —      | —      | 0.9%   | —      | —      | —      | —      |
| Education ( $p$ )               | .28    | .0060  | .22    | .10    | .28    | .41    | .41    | .0004  |
| Education ( $\Delta r^2$ )      | —      | 1.3%   | —      | —      | —      | —      | —      | 1.9%   |

WC = Word comprehension; SC = Sentence comprehension; WF = Word finding; GC = Grammatical construction; PE = Phonological encoding; SMP = Speech motor programming; SME = Speech motor execution; R = Reading.

**Supplementary Table 3** Recovery of QAB overall: model parameters

| Variable                     | Estimate    | SE       | <i>t</i> |
|------------------------------|-------------|----------|----------|
| (Intercept)                  | 0.800       | 0.122    | 6.58     |
| Preceding score              | 0.024       | 0.017    | 1.45     |
| Preceding score <sup>2</sup> | -0.010      | 0.002    | -6.24    |
| Timepoint T1–T2              | [Reference] |          |          |
| Timepoint T2–T3              | -0.058      | 0.031    | -1.89    |
| Timepoint T3–T4              | -0.132      | 0.036    | -3.68    |
| Location NA                  | [Reference] |          |          |
| Location F–                  | 0.101       | 0.069    | 1.47     |
| Location F+d                 | 0.117       | 0.071    | 1.65     |
| Location F+v                 | 0.166       | 0.071    | 2.34     |
| Location FTP                 | -0.203      | 0.086    | -2.37    |
| Location TP–                 | 0.018       | 0.075    | 0.24     |
| Location TP+                 | -0.046      | 0.079    | -0.59    |
| Location P                   | 0.083       | 0.071    | 1.17     |
| Location VT                  | 0.066       | 0.070    | 0.94     |
| Location BG                  | 0.021       | 0.068    | 0.31     |
| Location Th                  | 0.036       | 0.075    | 0.49     |
| Location M                   | 0.187       | 0.087    | 2.15     |
| Extent                       | -0.001      | 0.001    | -1.88    |
| Extent <sup>2</sup>          | 2.19e-06    | 2.11e-06 | 1.04     |
| Stroke type (H)              | 0.054       | 0.035    | 1.56     |
| Age                          | -0.001      | 0.001    | -1.29    |
| Sex (F)                      | 0.009       | 0.025    | 0.37     |
| Handedness (L/A)             | -0.048      | 0.039    | -1.24    |
| Education                    | 0.008       | 0.004    | 1.83     |

Dependent variable: Change in QAB overall between consecutive timepoints (transformed)

Number of observations: 298

Fixed effects coefficients: 23

Random effects coefficients: 120

Covariance parameters: 2

**Supplementary Table 4** Models of recovery of domain-specific subscores

|                                 | WC     | SC     | WF     | GC     | PE     | SMP    | SME    | R      |
|---------------------------------|--------|--------|--------|--------|--------|--------|--------|--------|
| Full model $r^2$                | 62.8%  | 30.5%  | 51.3%  | 66.0%  | 46.7%  | 53.9%  | 75.9%  | 49.3%  |
| Preceding score ( $p$ )         | <.0001 | <.0001 | <.0001 | <.0001 | <.0001 | <.0001 | <.0001 | <.0001 |
| Timepoint ( $p$ )               | .49    | .38    | .046   | .0029  | .17    | .13    | .050   | .0018  |
| Preceding/Time ( $\Delta r^2$ ) | 54.6%  | 25.5%  | 41.0%  | 46.6%  | 40.9%  | 23.3%  | 45.0%  | 37.6%  |
| Lesion location ( $p$ )         | .60    | .011   | .17    | .0001  | .19    | .013   | .91    | .24    |
| Lesion extent ( $p$ )           | .28    | .18    | .0079  | .85    | .70    | .96    | .13    | .45    |
| Lesion loc/ext ( $\Delta r^2$ ) | 3.1%   | 11.2%  | 11.7%  | 9.9%   | 4.7%   | 6.9%   | 0.9%   | 3.7%   |
| Stroke type ( $p$ )             | .99    | .90    | .20    | .0022  | .64    | .73    | .83    | .039   |
| Stroke type ( $\Delta r^2$ )    | —      | —      | —      | 1.2%   | —      | —      | —      | 0.8%   |
| Age ( $p$ )                     | .32    | .23    | .0005  | .70    | .095   | .96    | .78    | .24    |
| Age ( $\Delta r^2$ )            | —      | —      | 2.2%   | —      | —      | —      | —      | —      |
| Sex ( $p$ )                     | .43    | .54    | .61    | .013   | .37    | .69    | .78    | .0006  |
| Sex ( $\Delta r^2$ )            | —      | —      | —      | 0.8%   | —      | —      | —      | 2.2%   |
| Handedness ( $p$ )              | .15    | .47    | .77    | .44    | .42    | .69    | .19    | .70    |
| Handedness ( $\Delta r^2$ )     | —      | —      | —      | —      | —      | —      | —      | —      |
| Education ( $p$ )               | .18    | .19    | .73    | .0022  | .30    | .54    | .75    | .011   |
| Education ( $\Delta r^2$ )      | —      | —      | —      | 1.2%   | —      | —      | —      | 1.2%   |

WC = Word comprehension; SC = Sentence comprehension; WF = Word finding; GC = Grammatical construction; PE = Phonological encoding; SMP = Speech motor programming; SME = Speech motor execution; R = Reading.

## Supplementary Dataset

| PID  | Aphasia | Age | SexF | HandLA | Educ | StrHem | Location | Extent  | QAB_T1  | QAB_T2  | QAB_T3 | QAB_T4 | QAB_T1i | QAB_T2i | QAB_T3i | QAB_T4i |
|------|---------|-----|------|--------|------|--------|----------|---------|---------|---------|--------|--------|---------|---------|---------|---------|
| 1527 | 1       | 80  | 0    | 0      | 19   | 1      | VT       | 13.648  | 3.0900  | --      | 6.5200 | 8.6500 | 3.0900  | 5.5013  | 6.5200  | 8.6500  |
| 1526 | 0       | 50  | 1    | 0      | 9    | 0      | NA       | 4.864   | 8.5000  | --      | --     | --     | 8.5000  | --      | --      | --      |
| 1525 | 0       | 76  | 1    | 0      | 13   | 0      | VT       | 6.160   | 8.1200  | --      | --     | --     | 8.1200  | --      | --      | --      |
| 1528 | 0       | 54  | 1    | 0      | 12   | 1      | F-       | 6.232   | 8.7500  | --      | --     | --     | 8.7500  | --      | --      | --      |
| 1529 | 1       | 69  | 1    | 1      | 12   | 0      | FTP      | 248.400 | 8.0000  | --      | --     | --     | 8.0000  | --      | --      | --      |
| 1530 | 1       | 68  | 0    | 0      | 8    | 0      | O        | 23.192  | 6.9700  | --      | --     | --     | 6.9700  | --      | --      | --      |
| 1531 | 0       | 77  | 1    | 0      | 14   | 0      | Th       | 0.488   | 8.8300  | --      | --     | --     | 8.8300  | --      | --      | --      |
| 1532 | 1       | 80  | 1    | 0      | 15   | 1      | VT       | 33.504  | 5.8800  | --      | 8.8200 | 8.9700 | 5.8800  | 7.9468  | 8.8200  | 8.9700  |
| 1533 | 1       | 57  | 0    | 0      | 12   | 1      | BG       | 39.928  | 5.6900  | --      | --     | --     | 5.6900  | --      | --      | --      |
| 1534 | 1       | 84  | 1    | 0      | 8    | 0      | BG       | 11.280  | 6.9100  | --      | --     | --     | 6.9100  | --      | --      | --      |
| 1539 | 1       | 42  | 1    | 0      | 18   | 0      | F+d      | 261.424 | -1.0000 | --      | --     | 7.3600 | 0.0000  | 4.8472  | 6.5965  | 7.3600  |
| 1535 | 1       | 53  | 0    | 0      | 12   | 0      | FTP      | 199.512 | -1.0000 | --      | 2.4800 | 3.5800 | 0.0000  | 1.7434  | 2.4800  | 3.5800  |
| 1540 | 0       | 22  | 1    | 0      | 14   | 0      | BG       | 15.336  | 9.5700  | --      | --     | --     | 9.5700  | --      | --      | --      |
| 1541 | 1       | 81  | 1    | 0      | 14   | 0      | F+v      | 51.864  | -1.0000 | 7.4600  | 8.0500 | 8.8100 | 0.0000  | 7.4600  | 8.0500  | 8.8100  |
| 1542 | 0       | 85  | 1    | 0      | 12   | 0      | BG       | 1.784   | 9.0300  | --      | --     | --     | 9.0300  | --      | --      | --      |
| 1543 | 0       | 78  | 1    | 0      | 12   | 1      | BG       | 2.208   | 9.0500  | --      | --     | --     | 9.0500  | --      | --      | --      |
| 1549 | 1       | 74  | 0    | 0      | 14   | 0      | TP+      | 42.088  | 4.1300  | 5.9200  | 7.4500 | --     | 4.1300  | 5.9200  | 7.4500  | --      |
| 1548 | 1       | 63  | 0    | 1      | 12   | 0      | NA       | 30.272  | 6.8400  | --      | --     | --     | 6.8400  | --      | --      | --      |
| 1550 | 1       | 56  | 1    | 0      | 12   | 0      | F+v      | 94.944  | 1.9800  | 7.1600  | --     | --     | 1.9800  | 7.1600  | --      | --      |
| 1552 | 1       | 51  | 0    | 0      | 12   | 0      | F+v      | 59.720  | 4.4600  | --      | --     | --     | 4.4600  | --      | --      | --      |
| 1553 | 1       | 80  | 1    | 0      | 20   | 0      | BG       | 26.264  | 8.4600  | --      | --     | --     | 8.4600  | --      | --      | --      |
| 1554 | 1       | 43  | 1    | 0      | 15   | 0      | F+d      | 112.400 | 2.5300  | 4.2400  | 6.7100 | 7.8600 | 2.5300  | 4.2400  | 6.7100  | 7.8600  |
| 1556 | 1       | 76  | 1    | 0      | 12   | 0      | F+v      | 96.528  | 4.8200  | 7.7800  | --     | 9.1500 | 4.8200  | 7.7800  | 8.7338  | 9.1500  |
| 1557 | 1       | 64  | 1    | 0      | 12   | 0      | F-       | 13.256  | 9.2400  | 9.6700  | 9.8200 | --     | 9.2400  | 9.6700  | 9.8200  | --      |
| 1560 | 1       | 56  | 1    | 0      | 14   | 0      | Th       | 2.408   | 8.4800  | --      | --     | --     | 8.4800  | --      | --      | --      |
| 1561 | 0       | 78  | 1    | 0      | 15   | 1      | Th       | 2.304   | 8.9300  | --      | --     | --     | 8.9300  | --      | --      | --      |
| 1562 | 0       | 45  | 0    | 0      | 14   | 1      | BG       | 1.904   | 9.7800  | --      | --     | --     | 9.7800  | --      | --      | --      |
| 1563 | 1       | 50  | 1    | 0      | 9    | 0      | F+v      | 102.088 | 0.9900  | 2.6200  | --     | --     | 0.9900  | 2.6200  | --      | --      |
| 1564 | 1       | 81  | 1    | 0      | 12   | 0      | TP-      | 42.544  | 8.2400  | 7.9000  | 8.8500 | --     | 8.2400  | 7.9000  | 8.8500  | --      |
| 1565 | 0       | 75  | 1    | 0      | 18   | 0      | NA       | 1.960   | 8.6100  | --      | --     | --     | 8.6100  | --      | --      | --      |
| 1566 | 1       | 72  | 0    | 0      | 16   | 1      | BG       | 4.896   | 8.3000  | 9.2300  | 9.5600 | --     | 8.3000  | 9.2300  | 9.5600  | --      |
| 1569 | 1       | 23  | 1    | 0      | 11   | 1      | NA       | 118.728 | -1.0000 | --      | 3.4200 | 3.4500 | 0.0000  | 2.4042  | 3.4200  | 3.4500  |
| 1568 | 0       | 67  | 0    | 0      | 14   | 0      | BG       | 2.408   | 9.4900  | --      | --     | --     | 9.4900  | --      | --      | --      |
| 1570 | 0       | 48  | 1    | 0      | 12   | 0      | NA       | 10.032  | 9.1100  | --      | --     | --     | 9.1100  | --      | --      | --      |
| 1572 | 0       | 74  | 1    | 0      | 17   | 0      | Th       | 1.240   | 10.0000 | --      | --     | --     | 10.0000 | --      | --      | --      |
| 1577 | 1       | 39  | 1    | 0      | 12   | 0      | FTP      | 376.400 | -1.0000 | -1.0000 | 5.3100 | --     | 0.0000  | 0.0000  | 5.3100  | --      |
| 1575 | 0       | 60  | 0    | 0      | 9    | 1      | BG       | 8.376   | 8.9300  | --      | --     | --     | 8.9300  | --      | --      | --      |
| 1573 | 1       | 74  | 0    | 1      | 18   | 0      | P        | 33.464  | 5.6900  | --      | --     | --     | 5.6900  | --      | --      | --      |
| 1578 | 1       | 74  | 1    | 0      | 14   | 1      | TP+      | 72.744  | -1.0000 | 5.0600  | --     | --     | 0.0000  | 5.0600  | --      | --      |
| 1584 | 1       | 46  | 1    | 0      | 16   | 1      | BG       | 25.120  | 7.9100  | --      | 9.3000 | 9.2900 | 7.9100  | 8.8872  | 9.3000  | 9.2900  |
| 1588 | 1       | 48  | 1    | 0      | 16   | 0      | BG       | 10.680  | 8.5000  | --      | --     | --     | 8.5000  | --      | --      | --      |
| 1589 | 1       | 29  | 1    | 0      | 16   | 0      | TP+      | 102.560 | 4.8000  | --      | 7.0800 | 7.1900 | 4.8000  | 6.4028  | 7.0800  | 7.1900  |
| 1590 | 0       | 52  | 1    | 1      | 15   | 0      | Th       | 0.936   | 9.5700  | --      | --     | --     | 9.5700  | --      | --      | --      |
| 1593 | 1       | 58  | 0    | 0      | 14   | 1      | Th       | 4.536   | 8.4000  | 9.8500  | 9.7500 | --     | 8.4000  | 9.8500  | 9.7500  | --      |
| 1594 | 1       | 41  | 0    | 0      | 14   | 0      | F+v      | 46.720  | 5.2700  | 7.5200  | 9.4500 | 9.6100 | 5.2700  | 7.5200  | 9.4500  | 9.6100  |
| 1596 | 0       | 64  | 1    | 0      | 12   | 0      | NA       | 5.968   | 9.8100  | --      | --     | --     | 9.8100  | --      | --      | --      |
| 1600 | 1       | 71  | 0    | 0      | 12   | 0      | F+d      | 103.520 | 5.3100  | --      | --     | --     | 5.3100  | --      | --      | --      |
| 1598 | 0       | 63  | 1    | 1      | 12   | 0      | VT       | 3.712   | 8.2400  | --      | --     | --     | 8.2400  | --      | --      | --      |
| 1601 | 0       | 75  | 1    | 0      | 12   | 0      | R        | 1.656   | 9.5400  | --      | --     | --     | 9.5400  | --      | --      | --      |
| 1602 | 1       | 47  | 0    | 0      | 10   | 1      | F-       | 12.472  | 8.5500  | 9.2200  | 9.9000 | 9.8800 | 8.5500  | 9.2200  | 9.9000  | 9.8800  |
| 1604 | 0       | 45  | 0    | 0      | 16   | 0      | NA       | 5.736   | 10.0000 | --      | --     | --     | 10.0000 | --      | --      | --      |
| 1603 | 1       | 64  | 1    | 0      | 12   | 0      | BG       | 8.736   | 8.4000  | --      | --     | --     | 8.4000  | --      | --      | --      |
| 1606 | 0       | 69  | 0    | 0      | 16   | 0      | BG       | 18.672  | 9.3300  | --      | --     | --     | 9.3300  | --      | --      | --      |
| 1609 | 1       | 60  | 0    | 0      | 16   | 0      | F+v      | 95.536  | 0.9800  | 3.1500  | --     | --     | 0.9800  | 3.1500  | --      | --      |
| 1610 | 1       | 80  | 1    | 0      | 12   | 0      | F+d      | 64.032  | 0.1500  | --      | --     | --     | 0.1500  | --      | --      | --      |
| 1612 | 0       | 70  | 0    | 0      | 20   | 0      | R        | 10.008  | 8.6800  | --      | --     | --     | 8.6800  | --      | --      | --      |
| 1611 | 0       | 55  | 1    | 0      | 12   | 1      | O        | 9.104   | 9.0000  | --      | --     | --     | 9.0000  | --      | --      | --      |
| 1616 | 0       | 90  | 0    | 1      | 15   | 1      | Th       | 1.696   | 9.1900  | --      | --     | --     | 9.1900  | --      | --      | --      |

|      |   |    |   |   |    |   |     |         |         |        |        |        |         |        |        |        |
|------|---|----|---|---|----|---|-----|---------|---------|--------|--------|--------|---------|--------|--------|--------|
| 1619 | 1 | 51 | 0 | 0 | 12 | 0 | FTP | 231.624 | -1.0000 | 4.8600 | 3.4000 | 3.9400 | 0.0000  | 4.8600 | 3.4000 | 3.9400 |
| 1618 | 0 | 58 | 0 | 0 | 12 | 0 | Th  | 1.304   | 9.3500  | --     | --     | --     | 9.3500  | --     | --     | --     |
| 1617 | 0 | 58 | 1 | 0 | 16 | 0 | BG  | 5.640   | 9.7800  | --     | --     | --     | 9.7800  | --     | --     | --     |
| 1620 | 1 | 70 | 1 | 0 | 3  | 0 | TP- | 15.968  | 7.3400  | --     | --     | --     | 7.3400  | --     | --     | --     |
| 1622 | 0 | 84 | 1 | 0 | 12 | 0 | F-  | 8.480   | 9.2500  | --     | --     | --     | 9.2500  | --     | --     | --     |
| 1630 | 1 | 21 | 1 | 0 | 12 | 1 | F+d | 67.872  | 2.7800  | --     | --     | --     | 2.7800  | --     | --     | --     |
| 1631 | 0 | 85 | 1 | 1 | 12 | 0 | R   | 5.336   | 8.8700  | --     | --     | --     | 8.8700  | --     | --     | --     |
| 1634 | 1 | 73 | 0 | 0 | 11 | 0 | NA  | 31.528  | 8.1400  | 8.3200 | 8.8300 | 9.2300 | 8.1400  | 8.3200 | 8.8300 | 9.2300 |
| 1638 | 1 | 62 | 0 | 0 | 12 | 0 | F-  | 22.976  | 3.0700  | --     | --     | --     | 3.0700  | --     | --     | --     |
| 1640 | 0 | 49 | 0 | 0 | 16 | 0 | M   | 23.616  | 9.2700  | --     | --     | --     | 9.2700  | --     | --     | --     |
| 1642 | 0 | 64 | 0 | 0 | 14 | 0 | NA  | 1.656   | 9.4900  | --     | --     | --     | 9.4900  | --     | --     | --     |
| 1643 | 1 | 82 | 1 | 0 | 12 | 0 | R   | 10.080  | 8.0400  | --     | --     | --     | 8.0400  | --     | --     | --     |
| 1644 | 0 | 46 | 0 | 0 | 12 | 0 | BG  | 2.192   | 8.9000  | --     | --     | --     | 8.9000  | --     | --     | --     |
| 1646 | 1 | 65 | 1 | 0 | 14 | 0 | NA  | 23.424  | 5.8700  | --     | --     | --     | 5.8700  | --     | --     | --     |
| 1647 | 1 | 46 | 1 | 1 | 16 | 0 | FTP | 198.856 | 4.6400  | 5.3200 | --     | 4.8100 | 4.6400  | 5.3200 | 4.9650 | 4.8100 |
| 1648 | 0 | 87 | 1 | 0 | 15 | 0 | NA  | 2.568   | 9.8000  | --     | --     | --     | 9.8000  | --     | --     | --     |
| 1649 | 1 | 51 | 0 | 0 | 12 | 0 | F-  | 61.504  | 8.6100  | 9.5000 | 9.2500 | --     | 8.6100  | 9.5000 | 9.2500 | --     |
| 1651 | 1 | 44 | 1 | 0 | 16 | 0 | F+d | 145.472 | 3.8600  | 7.3400 | 8.9100 | --     | 3.8600  | 7.3400 | 8.9100 | --     |
| 1650 | 0 | 63 | 0 | 0 | 16 | 0 | VT  | 51.160  | 9.8900  | --     | --     | --     | 9.8900  | --     | --     | --     |
| 1652 | 1 | 67 | 0 | 0 | 3  | 0 | F+d | 131.888 | 4.7900  | 7.3900 | 7.2800 | 7.7200 | 4.7900  | 7.3900 | 7.2800 | 7.7200 |
| 1653 | 0 | 65 | 0 | 0 | 17 | 0 | O   | 8.536   | 9.6400  | --     | --     | --     | 9.6400  | --     | --     | --     |
| 1654 | 1 | 71 | 0 | 0 | 16 | 0 | F+v | 64.664  | 0.0000  | 3.1800 | 5.8100 | 6.8100 | 0.0000  | 3.1800 | 5.8100 | 6.8100 |
| 1656 | 1 | 80 | 1 | 0 | 12 | 0 | F-  | 4.464   | 6.9600  | 7.7300 | 7.7600 | 8.6600 | 6.9600  | 7.7300 | 7.7600 | 8.6600 |
| 1657 | 1 | 75 | 1 | 0 | 18 | 0 | TP- | 1.192   | 9.3300  | --     | 9.7300 | --     | 9.3300  | 9.6112 | 9.7300 | --     |
| 1658 | 0 | 67 | 0 | 0 | 12 | 0 | F-  | 2.184   | 9.2200  | --     | --     | --     | 9.2200  | --     | --     | --     |
| 1659 | 1 | 76 | 1 | 0 | 18 | 0 | TP+ | 87.296  | 0.8300  | 2.6800 | --     | --     | 0.8300  | 2.6800 | --     | --     |
| 1670 | 1 | 77 | 1 | 0 | 7  | 1 | O   | 5.024   | 8.9300  | --     | --     | --     | 8.9300  | --     | --     | --     |
| 1661 | 0 | 68 | 1 | 0 | 20 | 0 | BG  | 7.264   | 9.9500  | --     | --     | --     | 9.9500  | --     | --     | --     |
| 1663 | 1 | 42 | 1 | 1 | 12 | 0 | P   | 172.776 | 8.3500  | 8.9700 | 9.0500 | 9.2400 | 8.3500  | 8.9700 | 9.0500 | 9.2400 |
| 1667 | 1 | 44 | 0 | 1 | 15 | 0 | VT  | 145.240 | 6.8500  | 6.8500 | --     | --     | 6.8500  | 6.8500 | --     | --     |
| 1666 | 0 | 76 | 0 | 0 | 12 | 1 | O   | 9.696   | 9.5900  | --     | --     | --     | 9.5900  | --     | --     | --     |
| 1671 | 1 | 42 | 0 | 0 | 12 | 1 | BG  | 20.624  | -1.0000 | 5.5200 | 8.1900 | 8.0100 | 0.0000  | 5.5200 | 8.1900 | 8.0100 |
| 1676 | 1 | 42 | 1 | 1 | 12 | 0 | BG  | 39.576  | 7.7200  | --     | --     | --     | 7.7200  | --     | --     | --     |
| 1669 | 1 | 51 | 0 | 0 | 16 | 0 | VT  | 35.024  | 8.4600  | --     | --     | --     | 8.4600  | --     | --     | --     |
| 1674 | 0 | 58 | 0 | 0 | 15 | 0 | R   | 5.504   | 8.9200  | --     | --     | --     | 8.9200  | --     | --     | --     |
| 1678 | 0 | 49 | 1 | 0 | 11 | 0 | NA  | 13.920  | 8.0500  | --     | --     | --     | 8.0500  | --     | --     | --     |
| 1681 | 1 | 73 | 0 | 0 | 20 | 0 | BG  | 4.568   | 8.2700  | --     | 9.6200 | --     | 8.2700  | 9.2190 | 9.6200 | --     |
| 1679 | 0 | 58 | 0 | 0 | 12 | 1 | Th  | 1.176   | 10.0000 | --     | --     | --     | 10.0000 | --     | --     | --     |
| 1680 | 1 | 57 | 0 | 0 | 12 | 0 | VT  | 62.504  | 8.1200  | --     | --     | --     | 8.1200  | --     | --     | --     |
| 1682 | 0 | 63 | 0 | 0 | 8  | 0 | BG  | 5.680   | 9.0300  | --     | --     | --     | 9.0300  | --     | --     | --     |
| 1686 | 1 | 54 | 0 | 0 | 16 | 0 | FTP | 164.904 | 0.0800  | 0.2200 | 1.1000 | 2.1500 | 0.0800  | 0.2200 | 1.1000 | 2.1500 |
| 1685 | 1 | 67 | 1 | 0 | 8  | 0 | Th  | 0.624   | 5.4800  | --     | --     | --     | 5.4800  | --     | --     | --     |
| 1688 | 1 | 50 | 1 | 0 | 12 | 1 | Th  | 5.656   | 7.9800  | 9.0800 | --     | --     | 7.9800  | 9.0800 | --     | --     |
| 1689 | 0 | 72 | 1 | 0 | 12 | 0 | BG  | 3.280   | 8.8600  | --     | --     | --     | 8.8600  | --     | --     | --     |
| 1690 | 0 | 42 | 1 | 1 | 16 | 0 | BG  | 14.632  | 8.7100  | --     | --     | --     | 8.7100  | --     | --     | --     |
| 1691 | 0 | 77 | 0 | 0 | 16 | 0 | --  | NaN     | 9.7500  | --     | --     | --     | 9.7500  | --     | --     | --     |
| 1692 | 1 | 61 | 1 | 0 | 12 | 0 | F+d | 73.248  | 4.5200  | --     | --     | --     | 4.5200  | --     | --     | --     |
| 1699 | 0 | 51 | 1 | 0 | 12 | 1 | M   | 29.624  | 9.0600  | --     | --     | --     | 9.0600  | --     | --     | --     |
| 1698 | 0 | 51 | 0 | 1 | 16 | 0 | NA  | 3.400   | 9.5100  | --     | --     | --     | 9.5100  | --     | --     | --     |
| 1697 | 1 | 43 | 0 | 0 | 13 | 1 | NA  | 13.496  | 8.6700  | --     | --     | --     | 8.6700  | --     | --     | --     |
| 1701 | 1 | 76 | 0 | 0 | 12 | 0 | P   | 53.224  | 4.4000  | --     | --     | --     | 4.4000  | --     | --     | --     |
| 1700 | 0 | 63 | 1 | 0 | 16 | 0 | NA  | 4.072   | 9.3200  | --     | --     | --     | 9.3200  | --     | --     | --     |
| 1702 | 1 | 80 | 0 | 0 | 12 | 0 | P   | 22.016  | 6.7000  | 7.5200 | 8.1400 | 8.7100 | 6.7000  | 7.5200 | 8.1400 | 8.7100 |
| 1703 | 1 | 71 | 0 | 0 | 12 | 0 | F+d | 128.952 | 2.4700  | --     | --     | --     | 2.4700  | --     | --     | --     |
| 1704 | 0 | 60 | 1 | 0 | 16 | 0 | O   | 12.928  | 9.8200  | --     | --     | --     | 9.8200  | --     | --     | --     |
| 1705 | 0 | 74 | 0 | 0 | 12 | 0 | TP- | 12.336  | 9.9000  | --     | --     | --     | 9.9000  | --     | --     | --     |
| 1706 | 0 | 71 | 1 | 0 | 12 | 0 | BG  | 5.464   | 9.3700  | --     | --     | --     | 9.3700  | --     | --     | --     |
| 1707 | 0 | 28 | 0 | 0 | 13 | 0 | NA  | 1.584   | 9.8000  | --     | --     | --     | 9.8000  | --     | --     | --     |
| 1709 | 1 | 65 | 0 | 0 | 9  | 1 | M   | 42.832  | 5.4100  | --     | --     | --     | 5.4100  | --     | --     | --     |
| 1711 | 1 | 83 | 0 | 0 | 11 | 0 | P   | 35.808  | 6.6500  | 6.8300 | 7.5800 | --     | 6.6500  | 6.8300 | 7.5800 | --     |
| 1710 | 1 | 60 | 0 | 1 | 13 | 0 | F-  | 13.824  | 7.4400  | --     | --     | --     | 7.4400  | --     | --     | --     |
| 1712 | 1 | 48 | 0 | 0 | 12 | 0 | BG  | 28.312  | 7.8100  | 8.5600 | --     | --     | 7.8100  | 8.5600 | --     | --     |
| 1713 | 1 | 61 | 1 | 0 | 14 | 0 | F-  | 38.432  | 3.5300  | 6.9700 | 8.0300 | 8.6600 | 3.5300  | 6.9700 | 8.0300 | 8.6600 |
| 1714 | 0 | 81 | 1 | 0 | 12 | 1 | BG  | 5.200   | 9.9300  | --     | --     | --     | 9.9300  | --     | --     | --     |
| 1717 | 0 | 49 | 0 | 0 | 9  | 1 | BG  | 14.592  | 7.3600  | --     | --     | --     | 7.3600  | --     | --     | --     |
| 1715 | 0 | 61 | 0 | 0 | 14 | 0 | NA  | 4.560   | 9.6100  | --     | --     | --     | 9.6100  | --     | --     | --     |

|      |   |    |   |   |    |   |     |         |         |        |        |        |         |        |        |        |
|------|---|----|---|---|----|---|-----|---------|---------|--------|--------|--------|---------|--------|--------|--------|
| 1716 | 1 | 60 | 0 | 0 | 17 | 0 | VT  | 80.608  | 7.8200  | --     | --     | --     | 7.8200  | --     | --     | --     |
| 1718 | 0 | 64 | 1 | 0 | 16 | 0 | NA  | 3.808   | 9.8200  | --     | --     | --     | 9.8200  | --     | --     | --     |
| 1719 | 0 | 77 | 0 | 0 | 12 | 0 | --  | NaN     | 9.6500  | --     | --     | --     | 9.6500  | --     | --     | --     |
| 1722 | 1 | 79 | 1 | 0 | 12 | 0 | VT  | 84.104  | 4.9400  | --     | --     | --     | 4.9400  | --     | --     | --     |
| 1720 | 1 | 75 | 0 | 0 | 8  | 0 | Th  | 1.288   | 7.8700  | --     | --     | --     | 7.8700  | --     | --     | --     |
| 1724 | 1 | 64 | 1 | 0 | 14 | 0 | F-  | 20.592  | 7.4500  | 9.1200 | 9.2700 | 9.2000 | 7.4500  | 9.1200 | 9.2700 | 9.2000 |
| 1727 | 1 | 66 | 0 | 0 | 12 | 0 | P   | 12.600  | 8.0700  | --     | --     | --     | 8.0700  | --     | --     | --     |
| 1734 | 1 | 57 | 0 | 0 | 11 | 1 | Th  | 0.848   | 8.7000  | 8.1300 | 8.5300 | 8.4000 | 8.7000  | 8.1300 | 8.5300 | 8.4000 |
| 1741 | 1 | 64 | 1 | 0 | 12 | 1 | F+d | 65.488  | 5.7400  | 7.7800 | 8.9500 | 8.9700 | 5.7400  | 7.7800 | 8.9500 | 8.9700 |
| 1742 | 1 | 56 | 1 | 0 | 14 | 0 | F+d | 73.568  | 5.7900  | --     | 8.5600 | --     | 5.7900  | 7.7373 | 8.5600 | --     |
| 1750 | 0 | 72 | 1 | 0 | 12 | 1 | BG  | 6.832   | 9.6500  | --     | --     | --     | 9.6500  | --     | --     | --     |
| 1755 | 1 | 62 | 1 | 0 | 12 | 1 | VT  | 39.696  | 8.1800  | --     | --     | --     | 8.1800  | --     | --     | --     |
| 1764 | 0 | 28 | 1 | 0 | 12 | 0 | F-  | 27.392  | 9.4200  | --     | --     | --     | 9.4200  | --     | --     | --     |
| 1774 | 0 | 76 | 0 | 0 | 10 | 0 | BG  | 1.904   | 7.8600  | --     | --     | --     | 7.8600  | --     | --     | --     |
| 1776 | 1 | 60 | 0 | 0 | 12 | 0 | P   | 8.440   | 7.0100  | 8.5000 | 8.6100 | 8.6100 | 7.0100  | 8.5000 | 8.6100 | 8.6100 |
| 1775 | 0 | 54 | 1 | 0 | 14 | 0 | R   | 3.688   | 9.1700  | --     | --     | --     | 9.1700  | --     | --     | --     |
| 1777 | 0 | 35 | 1 | 0 | 13 | 0 | R   | 12.992  | 9.4600  | --     | --     | --     | 9.4600  | --     | --     | --     |
| 1779 | 0 | 62 | 0 | 1 | 12 | 1 | BG  | 8.048   | 8.1600  | --     | --     | --     | 8.1600  | --     | --     | --     |
| 1781 | 1 | 62 | 0 | 0 | 11 | 1 | F-  | 42.352  | 1.6100  | --     | --     | --     | 1.6100  | --     | --     | --     |
| 1782 | 1 | 60 | 1 | 0 | 13 | 1 | Th  | 17.832  | 2.0700  | --     | 9.6200 | 10.000 | 2.0700  | 7.3776 | 9.6200 | 10.000 |
| 1783 | 1 | 68 | 0 | 0 | 8  | 1 | TP- | 28.760  | 7.9300  | --     | --     | --     | 7.9300  | --     | --     | --     |
| 1786 | 1 | 69 | 0 | 0 | 13 | 1 | VT  | 22.000  | 6.8900  | 9.3000 | 9.7200 | 9.4200 | 6.8900  | 9.3000 | 9.7200 | 9.4200 |
| 1787 | 0 | 73 | 0 | 0 | 18 | 0 | R   | 5.184   | 9.9300  | --     | --     | --     | 9.9300  | --     | --     | --     |
| 1788 | 0 | 78 | 0 | 0 | 9  | 0 | Th  | 3.016   | 8.4500  | --     | --     | --     | 8.4500  | --     | --     | --     |
| 1789 | 1 | 67 | 1 | 0 | 11 | 0 | VT  | 43.184  | 3.4900  | --     | --     | --     | 3.4900  | --     | --     | --     |
| 1790 | 1 | 64 | 0 | 1 | 18 | 0 | F+d | 155.040 | 0.0800  | --     | --     | --     | 0.0800  | --     | --     | --     |
| 1793 | 1 | 55 | 0 | 0 | 16 | 0 | BG  | 25.864  | 8.1400  | --     | --     | --     | 8.1400  | --     | --     | --     |
| 1791 | 0 | 84 | 1 | 0 | 16 | 0 | R   | 1.424   | 8.8500  | --     | --     | --     | 8.8500  | --     | --     | --     |
| 1794 | 0 | 69 | 1 | 0 | 12 | 0 | BG  | 2.248   | 9.2000  | --     | --     | --     | 9.2000  | --     | --     | --     |
| 1795 | 1 | 70 | 1 | 0 | 3  | 0 | TP+ | 80.344  | 0.0000  | --     | --     | --     | 0.0000  | --     | --     | --     |
| 1804 | 1 | 69 | 0 | 0 | 14 | 1 | Th  | 29.688  | -1.0000 | 6.4200 | 7.9400 | 8.9400 | 0.0000  | 6.4200 | 7.9400 | 8.9400 |
| 1796 | 0 | 54 | 0 | 0 | 12 | 0 | BG  | 5.664   | 9.3700  | --     | --     | --     | 9.3700  | --     | --     | --     |
| 1797 | 0 | 50 | 1 | 0 | 9  | 1 | R   | 23.248  | 9.4300  | --     | --     | --     | 9.4300  | --     | --     | --     |
| 1801 | 0 | 65 | 0 | 0 | 16 | 0 | O   | 2.504   | 9.9500  | --     | --     | --     | 9.9500  | --     | --     | --     |
| 1802 | 0 | 80 | 1 | 0 | 16 | 0 | NA  | 1.312   | 9.9700  | --     | --     | --     | 9.9700  | --     | --     | --     |
| 1808 | 1 | 48 | 0 | 0 | 12 | 1 | BG  | 23.480  | 2.3300  | 8.3700 | 8.5800 | 9.0600 | 2.3300  | 8.3700 | 8.5800 | 9.0600 |
| 1809 | 0 | 55 | 0 | 1 | 12 | 0 | R   | 20.336  | 9.6000  | --     | --     | --     | 9.6000  | --     | --     | --     |
| 1810 | 0 | 68 | 0 | 0 | 12 | 0 | Th  | 2.128   | 9.2400  | --     | --     | --     | 9.2400  | --     | --     | --     |
| 1812 | 1 | 75 | 0 | 0 | 12 | 0 | TP- | 24.424  | 1.7600  | 4.7700 | 6.1000 | 6.6400 | 1.7600  | 4.7700 | 6.1000 | 6.6400 |
| 1814 | 1 | 62 | 0 | 0 | 12 | 1 | BG  | 7.552   | 8.4500  | --     | --     | --     | 8.4500  | --     | --     | --     |
| 1815 | 0 | 89 | 0 | 0 | 20 | 0 | O   | 8.760   | 9.5000  | --     | --     | --     | 9.5000  | --     | --     | --     |
| 1817 | 0 | 26 | 0 | 1 | 12 | 1 | TP- | 14.312  | 9.9200  | 9.7200 | --     | --     | 9.9200  | 9.7200 | --     | --     |
| 1821 | 1 | 83 | 0 | 0 | 16 | 0 | Th  | 0.728   | 8.5600  | 9.5100 | 9.7700 | 9.4200 | 8.5600  | 9.5100 | 9.7700 | 9.4200 |
| 1823 | 1 | 59 | 1 | 0 | 12 | 0 | F-  | 35.312  | 2.3200  | --     | --     | --     | 2.3200  | --     | --     | --     |
| 1825 | 1 | 81 | 1 | 0 | 12 | 0 | FTP | 156.752 | -1.0000 | 0.0000 | 1.3800 | --     | 0.0000  | 0.0000 | 1.3800 | --     |
| 1824 | 1 | 77 | 1 | 0 | 7  | 1 | TP- | 21.432  | 5.7900  | --     | --     | --     | 5.7900  | --     | --     | --     |
| 1826 | 1 | 78 | 0 | 0 | 12 | 0 | Th  | 5.480   | 6.1800  | --     | 8.1700 | 8.4200 | 6.1800  | 7.5790 | 8.1700 | 8.4200 |
| 1829 | 1 | 62 | 1 | 0 | 12 | 0 | NA  | 2.864   | 8.7000  | --     | --     | --     | 8.7000  | --     | --     | --     |
| 1833 | 1 | 65 | 0 | 1 | 14 | 1 | F-  | 11.072  | 1.0800  | --     | 7.5500 | 7.7000 | 1.0800  | 5.6283 | 7.5500 | 7.7000 |
| 1828 | 1 | 84 | 1 | 0 | 12 | 0 | F+v | 57.608  | 4.1200  | 6.4300 | 6.9900 | 7.5400 | 4.1200  | 6.4300 | 6.9900 | 7.5400 |
| 1834 | 1 | 70 | 1 | 0 | 12 | 0 | BG  | 30.008  | 7.3000  | --     | --     | --     | 7.3000  | --     | --     | --     |
| 1836 | 1 | 77 | 1 | 0 | 10 | 1 | BG  | 24.776  | 4.7100  | --     | --     | --     | 4.7100  | --     | --     | --     |
| 1843 | 1 | 46 | 1 | 0 | 12 | 0 | F+v | 93.288  | 2.5500  | --     | --     | --     | 2.5500  | --     | --     | --     |
| 1846 | 0 | 65 | 0 | 0 | 8  | 1 | BG  | 3.512   | 8.4800  | --     | --     | --     | 8.4800  | --     | --     | --     |
| 1848 | 0 | 66 | 0 | 0 | 12 | 0 | BG  | 5.512   | 9.4800  | --     | --     | --     | 9.4800  | --     | --     | --     |
| 1847 | 1 | 57 | 1 | 0 | 16 | 0 | P   | 30.680  | 8.4000  | 8.9300 | 8.9200 | 9.1000 | 8.4000  | 8.9300 | 8.9200 | 9.1000 |
| 1853 | 0 | 65 | 0 | 0 | 16 | 0 | NA  | 11.512  | 8.8800  | --     | --     | --     | 8.8800  | --     | --     | --     |
| 1854 | 0 | 46 | 0 | 0 | 12 | 1 | Th  | 4.904   | 9.7100  | --     | --     | --     | 9.7100  | --     | --     | --     |
| 1855 | 1 | 61 | 1 | 0 | 11 | 0 | TP+ | 121.176 | 2.0000  | 4.4000 | 5.1500 | 5.2500 | 2.0000  | 4.4000 | 5.1500 | 5.2500 |
| 1856 | 1 | 77 | 1 | 0 | 12 | 0 | P   | 23.376  | 4.6500  | --     | --     | --     | 4.6500  | --     | --     | --     |
| 1857 | 1 | 53 | 0 | 1 | 12 | 0 | VT  | 25.768  | 8.3200  | --     | --     | --     | 8.3200  | --     | --     | --     |
| 1858 | 0 | 65 | 1 | 1 | 12 | 0 | O   | 13.456  | 10.0000 | --     | --     | --     | 10.0000 | --     | --     | --     |
| 1862 | 1 | 54 | 1 | 0 | 16 | 1 | BG  | 36.240  | -1.0000 | 5.4200 | 8.8100 | 9.3400 | 0.0000  | 5.4200 | 8.8100 | 9.3400 |
| 1859 | 1 | 78 | 1 | 0 | 9  | 0 | TP- | 18.560  | 7.4900  | 8.4500 | 8.6700 | 8.2900 | 7.4900  | 8.4500 | 8.6700 | 8.2900 |
| 1861 | 1 | 61 | 1 | 0 | 13 | 0 | P   | 3.336   | 9.2300  | 9.2900 | 9.4100 | 9.4900 | 9.2300  | 9.2900 | 9.4100 | 9.4900 |
| 1865 | 1 | 39 | 1 | 0 | 14 | 0 | F+d | 99.512  | 4.3300  | --     | --     | --     | 4.3300  | --     | --     | --     |

|      |   |    |   |   |    |   |     |         |         |         |        |        |        |        |        |        |
|------|---|----|---|---|----|---|-----|---------|---------|---------|--------|--------|--------|--------|--------|--------|
| 1869 | 1 | 86 | 0 | 0 | 10 | 0 | F-  | 18.208  | 2.4300  | --      | --     | --     | 2.4300 | --     | --     | --     |
| 1870 | 1 | 65 | 0 | 0 | 20 | 0 | BG  | 5.184   | 9.1700  | --      | --     | --     | 9.1700 | --     | --     | --     |
| 1874 | 1 | 71 | 1 | 0 | 12 | 1 | M   | 73.888  | 7.9000  | --      | --     | --     | 7.9000 | --     | --     | --     |
| 1875 | 1 | 60 | 0 | 0 | 15 | 0 | F-  | 34.440  | 8.2600  | --      | --     | --     | 8.2600 | --     | --     | --     |
| 1878 | 1 | 61 | 0 | 0 | 12 | 0 | NA  | 187.848 | 1.9700  | 4.7200  | 5.4500 | --     | 1.9700 | 4.7200 | 5.4500 | --     |
| 1877 | 0 | 81 | 1 | 0 | 12 | 0 | BG  | 14.120  | 8.7500  | --      | --     | --     | 8.7500 | --     | --     | --     |
| 1880 | 1 | 63 | 0 | 0 | 12 | 0 | NA  | 8.256   | 7.1000  | --      | --     | --     | 7.1000 | --     | --     | --     |
| 1881 | 0 | 76 | 1 | 0 | 12 | 1 | P   | 6.584   | 9.1400  | --      | --     | --     | 9.1400 | --     | --     | --     |
| 1882 | 1 | 46 | 0 | 0 | 20 | 0 | BG  | 18.584  | 9.2700  | --      | --     | --     | 9.2700 | --     | --     | --     |
| 1886 | 1 | 55 | 0 | 0 | 12 | 0 | NA  | 12.760  | 7.8000  | --      | --     | --     | 7.8000 | --     | --     | --     |
| 1885 | 1 | 62 | 0 | 0 | 12 | 0 | Th  | 1.472   | 8.9000  | 9.5700  | 9.4800 | 9.2900 | 8.9000 | 9.5700 | 9.4800 | 9.2900 |
| 1888 | 1 | 79 | 0 | 0 | 10 | 0 | TP+ | 111.952 | 0.9700  | --      | --     | --     | 0.9700 | --     | --     | --     |
| 1889 | 1 | 60 | 0 | 0 | 12 | 0 | BG  | 9.992   | 4.0100  | --      | --     | --     | 4.0100 | --     | --     | --     |
| 1897 | 1 | 67 | 0 | 1 | 20 | 0 | FTP | 307.008 | -1.0000 | -1.0000 | 0.1500 | 0.9000 | 0.0000 | 0.0000 | 0.1500 | 0.9000 |
| 1892 | 1 | 53 | 1 | 0 | 12 | 0 | BG  | 12.632  | 7.7000  | 8.6800  | 8.7100 | --     | 7.7000 | 8.6800 | 8.7100 | --     |
| 1893 | 0 | 69 | 1 | 0 | 12 | 0 | F-  | 12.032  | 9.4700  | --      | --     | --     | 9.4700 | --     | --     | --     |
| 1894 | 1 | 64 | 0 | 1 | 10 | 0 | F-  | 19.176  | 8.2100  | 8.5900  | 9.5600 | --     | 8.2100 | 8.5900 | 9.5600 | --     |
| 1895 | 1 | 60 | 1 | 0 | 12 | 0 | F+v | 106.176 | 3.0300  | 6.5600  | --     | --     | 3.0300 | 6.5600 | --     | --     |
| 1898 | 0 | 63 | 1 | 0 | 13 | 0 | NA  | 4.504   | 9.1200  | --      | --     | --     | 9.1200 | --     | --     | --     |
| 1899 | 0 | 34 | 0 | 0 | 15 | 1 | BG  | 9.848   | 9.8500  | --      | --     | --     | 9.8500 | --     | --     | --     |
| 1909 | 0 | 51 | 1 | 0 | 11 | 0 | NA  | 7.880   | 9.1700  | --      | --     | --     | 9.1700 | --     | --     | --     |
| 1912 | 1 | 64 | 0 | 1 | 9  | 0 | P   | 28.040  | 4.4000  | 7.7000  | 8.7200 | 8.8300 | 4.4000 | 7.7000 | 8.7200 | 8.8300 |
| 1915 | 1 | 50 | 1 | 1 | 15 | 0 | O   | 12.216  | 9.0000  | 8.8000  | 9.3500 | --     | 9.0000 | 8.8000 | 9.3500 | --     |
| 1916 | 1 | 71 | 1 | 0 | 14 | 0 | TP- | 34.320  | 6.3100  | --      | --     | --     | 6.3100 | --     | --     | --     |
| 1917 | 1 | 67 | 0 | 0 | 14 | 1 | Th  | 9.552   | 2.2500  | 7.2700  | 8.2300 | 9.2100 | 2.2500 | 7.2700 | 8.2300 | 9.2100 |
| 1918 | 1 | 78 | 0 | 0 | 16 | 0 | F-  | 11.520  | 5.8100  | --      | --     | --     | 5.8100 | --     | --     | --     |
| 1923 | 1 | 38 | 1 | 0 | 13 | 0 | FTP | 144.360 | -1.0000 | 3.5900  | 5.3300 | --     | 0.0000 | 3.5900 | 5.3300 | --     |
| 1921 | 0 | 49 | 0 | 0 | 12 | 0 | Th  | 1.464   | 9.0900  | --      | --     | --     | 9.0900 | --     | --     | --     |
| 1924 | 1 | 51 | 0 | 0 | 12 | 0 | F-  | 29.648  | 7.8400  | --      | --     | --     | 7.8400 | --     | --     | --     |
| 1925 | 1 | 63 | 0 | 0 | 16 | 0 | BG  | 12.128  | 8.3500  | --      | --     | --     | 8.3500 | --     | --     | --     |
| 1926 | 1 | 62 | 1 | 0 | 12 | 0 | F+d | 101.768 | 3.1500  | 7.2000  | 8.2600 | 8.2500 | 3.1500 | 7.2000 | 8.2600 | 8.2500 |
| 1932 | 1 | 62 | 0 | 0 | 12 | 0 | FTP | 122.640 | 0.0000  | --      | --     | --     | 0.0000 | --     | --     | --     |
| 1934 | 1 | 77 | 0 | 0 | 12 | 0 | BG  | 20.592  | 6.4700  | --      | 7.8600 | --     | 6.4700 | 7.4472 | 7.8600 | --     |
| 1938 | 1 | 57 | 0 | 0 | 12 | 0 | TP- | 6.440   | 5.7900  | --      | --     | --     | 5.7900 | --     | --     | --     |
| 1940 | 1 | 57 | 1 | 1 | 12 | 0 | F-  | 48.032  | 7.4300  | --      | 9.2300 | 9.6000 | 7.4300 | 8.6954 | 9.2300 | 9.6000 |
| 1941 | 1 | 75 | 0 | 0 | 12 | 0 | F+d | 77.888  | 0.9700  | 2.7500  | 4.7700 | 5.9500 | 0.9700 | 2.7500 | 4.7700 | 5.9500 |
| 1945 | 1 | 83 | 1 | 0 | 5  | 0 | F+d | 71.864  | 5.1600  | --      | --     | --     | 5.1600 | --     | --     | --     |
| 1946 | 1 | 44 | 1 | 0 | 14 | 1 | Th  | 8.968   | 4.6600  | --      | --     | --     | 4.6600 | --     | --     | --     |
| 1948 | 1 | 51 | 0 | 0 | 12 | 1 | BG  | 18.008  | 8.6000  | --      | --     | --     | 8.6000 | --     | --     | --     |
| 1947 | 1 | 59 | 0 | 0 | 13 | 0 | BG  | 6.824   | 5.8700  | 8.1300  | 8.7400 | 8.8100 | 5.8700 | 8.1300 | 8.7400 | 8.8100 |
| 1950 | 0 | 56 | 0 | 0 | 12 | 0 | O   | 15.112  | 9.7000  | --      | --     | --     | 9.7000 | --     | --     | --     |
| 1953 | 0 | 59 | 1 | 0 | 15 | 1 | Th  | 6.144   | 9.4000  | --      | --     | --     | 9.4000 | --     | --     | --     |
| 1952 | 0 | 63 | 0 | 0 | 13 | 0 | O   | 5.384   | 9.4100  | --      | --     | --     | 9.4100 | --     | --     | --     |
| 1957 | 1 | 59 | 0 | 0 | 12 | 0 | BG  | 22.048  | 6.4400  | 6.8300  | 8.5100 | --     | 6.4400 | 6.8300 | 8.5100 | --     |
| 1954 | 0 | 59 | 1 | 0 | 14 | 0 | P   | 61.928  | 9.7900  | --      | --     | --     | 9.7900 | --     | --     | --     |
| 1956 | 0 | 37 | 0 | 0 | 12 | 0 | TP- | 26.496  | 9.4300  | --      | --     | --     | 9.4300 | --     | --     | --     |
| 1955 | 0 | 34 | 1 | 0 | 16 | 0 | O   | 4.904   | 9.8400  | --      | --     | --     | 9.8400 | --     | --     | --     |
| 1960 | 1 | 72 | 0 | 0 | 16 | 0 | VT  | 49.008  | 7.2400  | 7.4600  | 8.3600 | 8.8600 | 7.2400 | 7.4600 | 8.3600 | 8.8600 |
| 1962 | 0 | 51 | 0 | 0 | 12 | 0 | R   | 3.456   | 9.4100  | --      | --     | --     | 9.4100 | --     | --     | --     |
| 1964 | 1 | 83 | 0 | 0 | 10 | 0 | VT  | 46.872  | 2.7300  | 3.6100  | 5.3300 | --     | 2.7300 | 3.6100 | 5.3300 | --     |
| 1965 | 0 | 47 | 0 | 0 | 11 | 1 | P   | 4.744   | 9.7500  | --      | --     | --     | 9.7500 | --     | --     | --     |
| 1966 | 1 | 49 | 0 | 0 | 7  | 0 | BG  | 29.864  | 7.6500  | --      | --     | --     | 7.6500 | --     | --     | --     |
| 1967 | 1 | 50 | 0 | 0 | 15 | 0 | F-  | 22.624  | 8.7100  | 9.4000  | --     | --     | 8.7100 | 9.4000 | --     | --     |
| 1971 | 1 | 78 | 1 | 0 | 15 | 0 | NA  | 2.072   | 9.0300  | --      | --     | --     | 9.0300 | --     | --     | --     |
| 1968 | 1 | 23 | 1 | 0 | 14 | 0 | TP- | 33.888  | 9.5500  | --      | --     | --     | 9.5500 | --     | --     | --     |
| 1969 | 1 | 56 | 1 | 0 | 19 | 0 | F-  | 14.424  | 6.9800  | 8.1800  | --     | 8.7400 | 6.9800 | 8.1800 | 8.5699 | 8.7400 |
| 1970 | 1 | 76 | 1 | 1 | 6  | 0 | TP+ | 106.792 | 3.2400  | 3.1700  | 3.8500 | --     | 3.2400 | 3.1700 | 3.8500 | --     |
| 1973 | 1 | 87 | 0 | 0 | 13 | 0 | TP- | 20.480  | 5.4400  | 8.3400  | --     | --     | 5.4400 | 8.3400 | --     | --     |
| 1974 | 1 | 49 | 0 | 0 | 16 | 0 | VT  | 50.296  | 9.7500  | 9.7100  | 9.5700 | 9.7400 | 9.7500 | 9.7100 | 9.5700 | 9.7400 |
| 1977 | 1 | 53 | 0 | 0 | 10 | 0 | BG  | 33.736  | 6.3100  | --      | 7.2700 | --     | 6.3100 | 6.9849 | 7.2700 | --     |
| 1978 | 1 | 69 | 0 | 0 | 16 | 0 | BG  | 11.136  | 8.0300  | 9.1100  | 8.9900 | 8.8900 | 8.0300 | 9.1100 | 8.9900 | 8.8900 |
| 1979 | 1 | 72 | 0 | 0 | 10 | 0 | NA  | 2.592   | 7.7500  | --      | --     | --     | 7.7500 | --     | --     | --     |
| 1980 | 1 | 59 | 0 | 0 | 12 | 0 | TP+ | 54.936  | 2.1400  | 5.6800  | 6.4800 | --     | 2.1400 | 5.6800 | 6.4800 | --     |
| 1981 | 1 | 65 | 1 | 0 | 14 | 0 | FTP | 143.256 | 0.0000  | 0.3800  | 0.7100 | --     | 0.0000 | 0.3800 | 0.7100 | --     |
| 1983 | 1 | 63 | 0 | 0 | 16 | 0 | F+d | 93.344  | 3.5200  | 6.7200  | 7.6200 | 8.4300 | 3.5200 | 6.7200 | 7.6200 | 8.4300 |
| 1982 | 1 | 55 | 0 | 1 | 12 | 0 | TP- | 36.840  | 6.0000  | --      | --     | --     | 6.0000 | --     | --     | --     |



|      |   |    |   |   |    |   |     |         |         |         |        |        |        |        |        |        |
|------|---|----|---|---|----|---|-----|---------|---------|---------|--------|--------|--------|--------|--------|--------|
| 1985 | 1 | 74 | 1 | 1 | 12 | 0 | FTP | 221.256 | -1.0000 | -1.0000 | 5.9200 | 6.9000 | 0.0000 | 0.0000 | 5.9200 | 6.9000 |
| 1986 | 0 | 56 | 0 | 0 | 16 | 0 | VT  | 48.568  | 9.5500  | --      | --     | --     | 9.5500 | --     | --     | --     |
| 1988 | 1 | 43 | 0 | 0 | 12 | 0 | F+v | 106.048 | 2.8700  | 4.8000  | 6.6400 | 8.5500 | 2.8700 | 4.8000 | 6.6400 | 8.5500 |
| 1992 | 1 | 54 | 0 | 0 | 12 | 0 | FTP | 175.424 | 1.0500  | --      | --     | --     | 1.0500 | --     | --     | --     |
| 1990 | 1 | 52 | 1 | 0 | 14 | 1 | VT  | 9.232   | 2.5500  | 9.2000  | 9.4600 | 9.8000 | 2.5500 | 9.2000 | 9.4600 | 9.8000 |
| 1989 | 1 | 81 | 0 | 0 | 20 | 0 | BG  | 8.728   | 6.9100  | --      | --     | --     | 6.9100 | --     | --     | --     |
| 1995 | 1 | 73 | 1 | 0 | 12 | 1 | P   | 16.464  | 8.5200  | 9.7000  | --     | --     | 8.5200 | 9.7000 | --     | --     |
| 1996 | 1 | 41 | 0 | 0 | 19 | 0 | NA  | 14.184  | 8.0500  | 9.7100  | 9.8600 | 9.9000 | 8.0500 | 9.7100 | 9.8600 | 9.9000 |
| 1998 | 1 | 78 | 0 | 0 | 16 | 0 | FTP | 261.024 | 3.1400  | 4.7600  | 5.9100 | 4.6100 | 3.1400 | 4.7600 | 5.9100 | 4.6100 |
| 2000 | 0 | 61 | 1 | 0 | 7  | 0 | Th  | 2.344   | 8.6100  | --      | --     | --     | 8.6100 | --     | --     | --     |
| 2004 | 1 | 62 | 0 | 0 | 10 | 0 | Th  | 1.200   | 8.8100  | --      | --     | --     | 8.8100 | --     | --     | --     |
| 2007 | 1 | 58 | 0 | 0 | 16 | 1 | M   | 80.296  | 8.8700  | 9.6600  | --     | --     | 8.8700 | 9.6600 | --     | --     |
| 2009 | 1 | 50 | 0 | 0 | 12 | 0 | TP+ | 126.456 | 4.6900  | --      | --     | --     | 4.6900 | --     | --     | --     |
| 2011 | 1 | 66 | 1 | 0 | 12 | 0 | F+d | 198.536 | 0.5300  | --      | --     | --     | 0.5300 | --     | --     | --     |
| 2014 | 1 | 33 | 0 | 0 | 12 | 1 | BG  | 22.824  | 8.3000  | 9.6900  | 9.6600 | --     | 8.3000 | 9.6900 | 9.6600 | --     |
| 2013 | 1 | 76 | 0 | 0 | 8  | 1 | TP- | 17.288  | 6.3700  | 8.9700  | 9.1300 | --     | 6.3700 | 8.9700 | 9.1300 | --     |
| 2010 | 1 | 38 | 1 | 0 | 12 | 1 | BG  | 9.024   | 7.3500  | --      | --     | --     | 7.3500 | --     | --     | --     |
| 2015 | 0 | 30 | 1 | 0 | 15 | 0 | P   | 5.384   | 9.9000  | --      | --     | --     | 9.9000 | --     | --     | --     |
| 2016 | 0 | 38 | 1 | 1 | 16 | 0 | BG  | 30.520  | 9.9000  | --      | --     | --     | 9.9000 | --     | --     | --     |
| 2017 | 0 | 74 | 1 | 0 | 14 | 0 | Th  | 2.056   | 8.0800  | --      | --     | --     | 8.0800 | --     | --     | --     |
| 2018 | 1 | 80 | 1 | 0 | 9  | 0 | NA  | 12.224  | 8.2000  | 8.6900  | 9.5600 | 8.8900 | 8.2000 | 8.6900 | 9.5600 | 8.8900 |
| 2019 | 1 | 63 | 0 | 0 | 13 | 0 | TP+ | 90.752  | 3.6400  | --      | --     | --     | 3.6400 | --     | --     | --     |
| 2021 | 0 | 56 | 0 | 1 | 16 | 0 | M   | 45.688  | 9.7300  | --      | --     | --     | 9.7300 | --     | --     | --     |
| 2022 | 0 | 62 | 1 | 1 | 14 | 0 | O   | 17.952  | 9.0700  | --      | --     | --     | 9.0700 | --     | --     | --     |
| 2024 | 0 | 72 | 1 | 0 | 12 | 0 | O   | 9.448   | 9.8200  | --      | --     | --     | 9.8200 | --     | --     | --     |
| 2026 | 1 | 47 | 0 | 1 | 12 | 0 | F+v | 54.496  | -1.0000 | 5.7900  | 7.9800 | 9.0700 | 0.0000 | 5.7900 | 7.9800 | 9.0700 |
| 2025 | 1 | 79 | 1 | 0 | 8  | 0 | VT  | 21.552  | 7.6100  | --      | --     | --     | 7.6100 | --     | --     | --     |
| 2027 | 1 | 67 | 0 | 0 | 16 | 0 | VT  | 68.688  | 8.5400  | 9.3000  | 9.3600 | 9.9000 | 8.5400 | 9.3000 | 9.3600 | 9.9000 |
| 2028 | 0 | 56 | 1 | 1 | 12 | 1 | M   | 13.088  | 9.6500  | 10.000  | --     | --     | 9.6500 | 10.000 | --     | --     |
| 2032 | 0 | 82 | 0 | 0 | 12 | 0 | F-  | 15.952  | 9.5100  | --      | --     | --     | 9.5100 | --     | --     | --     |
| 2031 | 0 | 68 | 0 | 0 | 12 | 0 | R   | 4.744   | 9.8100  | --      | --     | --     | 9.8100 | --     | --     | --     |
| 2033 | 1 | 74 | 1 | 0 | 9  | 0 | TP- | 14.912  | 7.4500  | --      | --     | --     | 7.4500 | --     | --     | --     |
| 2034 | 1 | 71 | 0 | 1 | 15 | 0 | TP+ | 86.824  | 3.2000  | --      | --     | --     | 3.2000 | --     | --     | --     |
| 2036 | 1 | 64 | 1 | 0 | 12 | 0 | NA  | 32.520  | 9.1000  | --      | --     | --     | 9.1000 | --     | --     | --     |
| 2038 | 1 | 57 | 1 | 0 | 10 | 0 | P   | 50.552  | 8.9200  | --      | --     | --     | 8.9200 | --     | --     | --     |
| 2039 | 1 | 55 | 0 | 0 | 16 | 0 | FTP | 171.088 | 2.4200  | 4.9000  | 4.7800 | 5.6200 | 2.4200 | 4.9000 | 4.7800 | 5.6200 |
| 2037 | 0 | 23 | 1 | 0 | 16 | 0 | Th  | 9.168   | 9.9000  | --      | --     | --     | 9.9000 | --     | --     | --     |
| 2041 | 1 | 73 | 1 | 0 | 18 | 0 | TP- | 14.424  | 7.4200  | --      | --     | --     | 7.4200 | --     | --     | --     |
| 2049 | 1 | 72 | 1 | 0 | 12 | 0 | P   | 12.664  | 7.0400  | 9.0200  | 9.4100 | 9.5100 | 7.0400 | 9.0200 | 9.4100 | 9.5100 |
| 2050 | 0 | 77 | 1 | 0 | 16 | 0 | NA  | 2.832   | 9.5800  | --      | --     | --     | 9.5800 | --     | --     | --     |
| 2051 | 1 | 62 | 1 | 1 | 14 | 0 | NA  | 11.000  | 9.6300  | --      | --     | --     | 9.6300 | --     | --     | --     |
| 2052 | 1 | 76 | 1 | 0 | 12 | 0 | Th  | 2.776   | 8.0300  | --      | --     | --     | 8.0300 | --     | --     | --     |
| 2055 | 1 | 67 | 1 | 0 | 12 | 0 | F-  | 26.480  | 5.3600  | 8.0800  | 8.7900 | 8.9300 | 5.3600 | 8.0800 | 8.7900 | 8.9300 |
| 2056 | 1 | 57 | 0 | 0 | 12 | 0 | F-  | 11.928  | 8.0400  | 9.9300  | 9.7900 | --     | 8.0400 | 9.9300 | 9.7900 | --     |
| 2059 | 1 | 78 | 0 | 0 | 13 | 0 | TP+ | 77.984  | 3.0700  | 7.1100  | 7.9900 | --     | 3.0700 | 7.1100 | 7.9900 | --     |
| 2058 | 0 | 74 | 0 | 0 | 20 | 1 | M   | 26.536  | 8.4400  | --      | --     | --     | 8.4400 | --     | --     | --     |
| 2060 | 0 | 81 | 1 | 0 | 17 | 0 | Th  | 0.904   | 9.5800  | --      | --     | --     | 9.5800 | --     | --     | --     |
| 2061 | 1 | 71 | 1 | 0 | 12 | 0 | TP- | 22.472  | 4.3300  | 7.7400  | 8.0600 | 8.5100 | 4.3300 | 7.7400 | 8.0600 | 8.5100 |
| 2063 | 0 | 34 | 1 | 0 | 14 | 1 | M   | 21.496  | 9.7600  | --      | --     | --     | 9.7600 | --     | --     | --     |
| 2066 | 1 | 62 | 0 | 0 | 16 | 0 | TP- | 30.936  | 6.8000  | 7.9100  | 8.0600 | 8.6800 | 6.8000 | 7.9100 | 8.0600 | 8.6800 |
| 2067 | 1 | 64 | 1 | 0 | 20 | 0 | F-  | 67.760  | 9.1900  | --      | --     | --     | 9.1900 | --     | --     | --     |
| 2070 | 0 | 21 | 1 | 0 | 12 | 0 | BG  | 6.256   | 9.9500  | --      | --     | --     | 9.9500 | --     | --     | --     |
| 2072 | 1 | 63 | 0 | 0 | 20 | 1 | Th  | 4.888   | 8.1700  | --      | --     | --     | 8.1700 | --     | --     | --     |
| 2074 | 1 | 67 | 0 | 1 | 13 | 0 | BG  | 15.960  | 8.2100  | 8.7800  | 8.8200 | 8.8300 | 8.2100 | 8.7800 | 8.8200 | 8.8300 |
| 2077 | 1 | 60 | 0 | 0 | 12 | 1 | VT  | 10.472  | 8.3700  | --      | --     | --     | 8.3700 | --     | --     | --     |
| 2096 | 1 | 68 | 0 | 0 | 12 | 0 | VT  | 25.432  | 5.8300  | --      | --     | --     | 5.8300 | --     | --     | --     |
| 2085 | 1 | 85 | 1 | 0 | 0  | 0 | TP+ | 42.312  | 0.0000  | --      | --     | --     | 0.0000 | --     | --     | --     |
| 2089 | 0 | 54 | 0 | 0 | 13 | 0 | O   | 13.416  | 9.8600  | --      | --     | --     | 9.8600 | --     | --     | --     |
| 2090 | 1 | 90 | 0 | 0 | 18 | 1 | BG  | 32.904  | 0.7900  | 8.0200  | --     | 8.4700 | 0.7900 | 8.0200 | 8.3333 | 8.4700 |
| 2091 | 0 | 67 | 1 | 1 | 12 | 0 | R   | 14.008  | 9.9200  | --      | --     | --     | 9.9200 | --     | --     | --     |
| 2092 | 1 | 79 | 0 | 0 | 12 | 0 | TP- | 29.456  | 5.0600  | 6.7000  | --     | --     | 5.0600 | 6.7000 | --     | --     |
| 2103 | 1 | 65 | 1 | 0 | 18 | 0 | M   | 6.032   | -1.0000 | 8.0500  | --     | 9.1300 | 0.0000 | 8.0500 | 8.8019 | 9.1300 |
| 2094 | 0 | 77 | 0 | 1 | 11 | 0 | O   | 6.088   | 9.6200  | --      | --     | --     | 9.6200 | --     | --     | --     |
| 2102 | 1 | 81 | 1 | 0 | 12 | 0 | F-  | 29.448  | 1.4000  | --      | --     | --     | 1.4000 | --     | --     | --     |
| 2105 | 1 | 47 | 0 | 0 | 18 | 0 | M   | 30.832  | 5.8900  | 8.7000  | 9.3900 | 9.8600 | 5.8900 | 8.7000 | 9.3900 | 9.8600 |
| 2108 | 1 | 52 | 0 | 0 | 16 | 0 | F+d | 101.016 | 3.2300  | 7.3100  | 8.2500 | --     | 3.2300 | 7.3100 | 8.2500 | --     |

|      |   |    |   |   |    |   |     |         |         |        |        |        |        |        |        |        |
|------|---|----|---|---|----|---|-----|---------|---------|--------|--------|--------|--------|--------|--------|--------|
| 2110 | 0 | 72 | 1 | 0 | 15 | 0 | NA  | 15.992  | 8.6500  | --     | --     | --     | 8.6500 | --     | --     | --     |
| 2111 | 1 | 55 | 0 | 0 | 12 | 0 | TP- | 14.640  | 6.4000  | --     | --     | --     | 6.4000 | --     | --     | --     |
| 2109 | 1 | 54 | 1 | 0 | 16 | 0 | M   | 16.008  | 7.3700  | --     | 9.3100 | --     | 7.3700 | 8.7338 | 9.3100 | --     |
| 2113 | 1 | 50 | 1 | 0 | 12 | 0 | F+v | 97.888  | 3.3600  | --     | --     | --     | 3.3600 | --     | --     | --     |
| 2112 | 0 | 89 | 1 | 0 | 20 | 0 | BG  | 13.352  | 8.9800  | --     | --     | --     | 8.9800 | --     | --     | --     |
| 2115 | 1 | 61 | 1 | 0 | 8  | 0 | VT  | 27.840  | 6.1200  | --     | 8.8300 | 9.5200 | 6.1200 | 8.0251 | 8.8300 | 9.5200 |
| 2116 | 1 | 51 | 1 | 0 | 12 | 0 | F+d | 184.544 | -1.0000 | 2.0300 | --     | 5.9600 | 0.0000 | 2.0300 | 4.7659 | 5.9600 |
| 2119 | 1 | 76 | 1 | 1 | 14 | 0 | F+d | 70.408  | -1.0000 | --     | 4.2600 | 4.7600 | 0.0000 | 2.9947 | 4.2600 | 4.7600 |
| 2120 | 1 | 21 | 0 | 1 | 14 | 1 | M   | 39.616  | 6.1900  | 9.8000 | --     | --     | 6.1900 | 9.8000 | --     | --     |
| 2121 | 1 | 47 | 1 | 0 | 12 | 0 | M   | 8.672   | 5.0000  | 9.8100 | --     | --     | 5.0000 | 9.8100 | --     | --     |
| 2123 | 0 | 79 | 0 | 0 | 12 | 0 | R   | 2.688   | 8.4100  | --     | --     | --     | 8.4100 | --     | --     | --     |
| 2125 | 1 | 84 | 0 | 0 | 12 | 0 | NA  | 2.584   | 3.8900  | --     | --     | --     | 3.8900 | --     | --     | --     |

## Supplementary Matlab Code

```
% read dataset
tbl = readtable('supp_dataset.txt', 'ReadVariableNames', true, 'TreatAsEmpty', '--');

% exclude two patients with no lesion available
tbl = tbl(~strcmp(tbl.Location, '--'), :);
% reorder Location categories so that NA is reference level
tbl.Location = categorical(tbl.Location);
tbl.Location = reordercats(tbl.Location, {'NA', 'F-', 'F+d', 'F+v', 'FTP', 'TP-',
'TP+', 'P', 'VT', 'BG', 'Th', 'M', 'O', 'R'});

% -----
% Initial evaluation
% -----

fprintf('\nMODEL OF INITIAL SCORES\n\n');

% full model
mdl = fitlm(tbl, 'QAB_Tli ~ Age + SexF + HandLA + Educ + StrHem + Location + Extent +
Extent^2');

mdl_intercept = fitlm(tbl, 'QAB_Tli ~ 1');
r2 = 1 - exp(-2 / mdl.NumObservations * (mdl.LogLikelihood -
mdl_intercept.LogLikelihood)); % Magee (1990), works for LMM too

fprintf('Variance accounted for by full model: %.1f%%\n', r2 * 100);

% use model comparison approach to test effects of interest

% Lesion location
mdl_reduced = fitlm(tbl, 'QAB_Tli ~ Age + SexF + HandLA + Educ + StrHem + Extent +
Extent^2');
lr = 2 * (mdl.LogLikelihood - mdl_reduced.LogLikelihood);
df = mdl.NumEstimatedCoefficients - mdl_reduced.NumEstimatedCoefficients;
pval = 1 - chi2cdf(lr, df);
fprintf('Effect of lesion location:  $\chi^2$ (%d) = %.2f, p = %.4f\n', df, lr, pval);

% Lesion extent
mdl_reduced = fitlm(tbl, 'QAB_Tli ~ Age + SexF + HandLA + Educ + StrHem + Location');
lr = 2 * (mdl.LogLikelihood - mdl_reduced.LogLikelihood);
df = mdl.NumEstimatedCoefficients - mdl_reduced.NumEstimatedCoefficients;
pval = 1 - chi2cdf(lr, df);
fprintf('Effect of lesion extent:  $\chi^2$ (%d) = %.2f, p = %.4f\n', df, lr, pval);

% Differential variance
mdl_reduced = fitlm(tbl, 'QAB_Tli ~ Age + SexF + HandLA + Educ + StrHem');
r2r = 1 - exp(-2 / mdl_reduced.NumObservations * (mdl_reduced.LogLikelihood -
mdl_intercept.LogLikelihood));
delta_r2 = (r2 - r2r) * 100;
fprintf('\n $\Delta r^2 = %.1f%%$ \n', delta_r2);

% Other factors
mdl_reduced = fitlm(tbl, 'QAB_Tli ~ Age + SexF + HandLA + Educ + Location + Extent +
Extent^2');
lr = 2 * (mdl.LogLikelihood - mdl_reduced.LogLikelihood);
df = mdl.NumEstimatedCoefficients - mdl_reduced.NumEstimatedCoefficients;
pval = 1 - chi2cdf(lr, df);
r2r = 1 - exp(-2 / mdl_reduced.NumObservations * (mdl_reduced.LogLikelihood -
mdl_intercept.LogLikelihood));
delta_r2 = (r2 - r2r) * 100;
```

```

fprintf('Effect of stroke type:  $\chi^2$ (%d) = %.2f, p = %.4f,  $\Delta r^2$  = %.1f%%\n', df, lr,
pval, delta_r2);

mdl_reduced = fitlm(tbl, 'QAB_Tli ~ SexF + HandLA + Educ + StrHem + Location + Extent
+ Extent^2');
lr = 2 * (mdl.LogLikelihood - mdl_reduced.LogLikelihood);
df = mdl.NumEstimatedCoefficients - mdl_reduced.NumEstimatedCoefficients;
pval = 1 - chi2cdf(lr, df);
r2r = 1 - exp(-2 / mdl_reduced.NumObservations * (mdl_reduced.LogLikelihood -
mdl_intercept.LogLikelihood));
delta_r2 = (r2 - r2r) * 100;
fprintf('Effect of age:  $\chi^2$ (%d) = %.2f, p = %.4f,  $\Delta r^2$  = %.1f%%\n', df, lr, pval,
delta_r2);

mdl_reduced = fitlm(tbl, 'QAB_Tli ~ Age + HandLA + Educ + StrHem + Location + Extent +
Extent^2');
lr = 2 * (mdl.LogLikelihood - mdl_reduced.LogLikelihood);
df = mdl.NumEstimatedCoefficients - mdl_reduced.NumEstimatedCoefficients;
pval = 1 - chi2cdf(lr, df);
r2r = 1 - exp(-2 / mdl_reduced.NumObservations * (mdl_reduced.LogLikelihood -
mdl_intercept.LogLikelihood));
delta_r2 = (r2 - r2r) * 100;
fprintf('Effect of sex:  $\chi^2$ (%d) = %.2f, p = %.4f,  $\Delta r^2$  = %.1f%%\n', df, lr, pval,
delta_r2);

mdl_reduced = fitlm(tbl, 'QAB_Tli ~ Age + SexF + Educ + StrHem + Location + Extent +
Extent^2');
lr = 2 * (mdl.LogLikelihood - mdl_reduced.LogLikelihood);
df = mdl.NumEstimatedCoefficients - mdl_reduced.NumEstimatedCoefficients;
pval = 1 - chi2cdf(lr, df);
r2r = 1 - exp(-2 / mdl_reduced.NumObservations * (mdl_reduced.LogLikelihood -
mdl_intercept.LogLikelihood));
delta_r2 = (r2 - r2r) * 100;
fprintf('Effect of handedness:  $\chi^2$ (%d) = %.2f, p = %.4f,  $\Delta r^2$  = %.1f%%\n', df, lr,
pval, delta_r2);

mdl_reduced = fitlm(tbl, 'QAB_Tli ~ Age + SexF + HandLA + StrHem + Location + Extent +
Extent^2');
lr = 2 * (mdl.LogLikelihood - mdl_reduced.LogLikelihood);
df = mdl.NumEstimatedCoefficients - mdl_reduced.NumEstimatedCoefficients;
pval = 1 - chi2cdf(lr, df);
r2r = 1 - exp(-2 / mdl_reduced.NumObservations * (mdl_reduced.LogLikelihood -
mdl_intercept.LogLikelihood));
delta_r2 = (r2 - r2r) * 100;
fprintf('Effect of education:  $\chi^2$ (%d) = %.2f, p = %.4f,  $\Delta r^2$  = %.1f%%\n', df, lr,
pval, delta_r2);

% -----
% Recovery
% -----

fprintf('\nMODEL OF RECOVERY\n\n');

% create a new table with one row for each pair of adjacent observations
tbl2 = table;
n = size(tbl, 1);
i = 0;
warning off
for s = 1:n
    if tbl.Aphasia(s) && tbl.Location(s) ~= 'O' && tbl.Location(s) ~= 'R'
        for t = 1:3
            y1 = tbl.(sprintf('QAB_T%i', t))(s); % score at earlier timepoint
            y2 = tbl.(sprintf('QAB_T%i', t + 1))(s); % score at later timepoint

```

```

if ~isnan(y1) && ~isnan(y2)
    i = i + 1;

    % copy variables across to new table
    tbl2.PID(i) = tbl.PID(s);
    tbl2.Age(i) = tbl.Age(s);
    tbl2.SexF(i) = tbl.SexF(s);
    tbl2.HandLA(i) = tbl.HandLA(s);
    tbl2.Educ(i) = tbl.Educ(s);
    tbl2.StrHem(i) = tbl.StrHem(s);
    tbl2.Location(i) = tbl.Location(s);
    tbl2.Extent(i) = tbl.Extent(s);

    % timepoint and preceding score predictors
    tbl2.Timepoint{i} = sprintf('T%d%d', t, t + 1);
    tbl2.Preceding(i) = y1;

    % inverse hyperbolic sine transformation of difference score
    lambda = 4;
    tbl2.DeltaQAB(i) = asinh((y2 - y1) * lambda) / lambda;
end
end
end
end
warning on
tbl2.Location = removecats(tbl2.Location);

% full model
mdl = fitlme(tbl2, 'DeltaQAB ~ Preceding + Preceding^2 + Timepoint + Age + SexF +
HandLA + Educ + StrHem + Location + Extent + Extent^2 + (1 | PID)');

mdl_intercept = fitlme(tbl2, 'DeltaQAB ~ 1');
r2 = 1 - exp(-2 / mdl.NumObservations * (mdl.LogLikelihood -
mdl_intercept.LogLikelihood));

fprintf('Variance accounted for by full model: %.1f%%\n', r2 * 100);

% use model comparison approach to test effects of interet

% Preceding score
mdl_reduced = fitlme(tbl2, 'DeltaQAB ~ Timepoint + Age + SexF + HandLA + Educ + StrHem
+ Location + Extent + Extent^2 + (1 | PID)');
lr = 2 * (mdl.LogLikelihood - mdl_reduced.LogLikelihood);
df = mdl.NumEstimatedCoefficients - mdl_reduced.NumEstimatedCoefficients;
pval = 1 - chi2cdf(lr, df);
fprintf('Effect of preceding score:  $\chi^2$ (%d) = %.2f, p = %.4f\n', df, lr, pval);

% Timepoint
mdl_reduced = fitlme(tbl2, 'DeltaQAB ~ Preceding + Preceding^2 + Age + SexF + HandLA +
Educ + StrHem + Location + Extent + Extent^2 + (1 | PID)');
lr = 2 * (mdl.LogLikelihood - mdl_reduced.LogLikelihood);
df = mdl.NumEstimatedCoefficients - mdl_reduced.NumEstimatedCoefficients;
pval = 1 - chi2cdf(lr, df);
fprintf('Effect of timepoint:  $\chi^2$ (%d) = %.2f, p = %.4f\n', df, lr, pval);

% Differential variance
mdl_reduced = fitlme(tbl2, 'DeltaQAB ~ Age + SexF + HandLA + Educ + StrHem + Location
+ Extent + Extent^2 + (1 | PID)');
r2r = 1 - exp(-2 / mdl_reduced.NumObservations * (mdl_reduced.LogLikelihood -
mdl_intercept.LogLikelihood));
delta_r2 = (r2 - r2r) * 100;
fprintf('Delta_r^2 = %.1f%%\n', delta_r2);

```

```

% Lesion location
mdl_reduced = fitlme(tbl2, 'DeltaQAB ~ Preceding + Preceding^2 + Timepoint + Age +
SexF + HandLA + Educ + StrHem + Extent + Extent^2 + (1 | PID)');
lr = 2 * (mdl.LogLikelihood - mdl_reduced.LogLikelihood);
df = mdl.NumEstimatedCoefficients - mdl_reduced.NumEstimatedCoefficients;
pval = 1 - chi2cdf(lr, df);
fprintf('Effect of lesion location:  $\chi^2$ (%d) = %.2f, p = %.4f\n', df, lr, pval);

% Lesion extent
mdl_reduced = fitlme(tbl2, 'DeltaQAB ~ Preceding + Preceding^2 + Timepoint + Age +
SexF + HandLA + Educ + StrHem + Location + (1 | PID)');
lr = 2 * (mdl.LogLikelihood - mdl_reduced.LogLikelihood);
df = mdl.NumEstimatedCoefficients - mdl_reduced.NumEstimatedCoefficients;
pval = 1 - chi2cdf(lr, df);
fprintf('Effect of lesion extent:  $\chi^2$ (%d) = %.2f, p = %.4f\n', df, lr, pval);

% Differential variance
mdl_reduced = fitlme(tbl2, 'DeltaQAB ~ Preceding + Preceding^2 + Timepoint + Age +
SexF + HandLA + Educ + StrHem + (1 | PID)');
r2r = 1 - exp(-2 / mdl_reduced.NumObservations * (mdl_reduced.LogLikelihood -
mdl_intercept.LogLikelihood));
delta_r2 = (r2 - r2r) * 100;
fprintf('Delta_r2 = %.1f%%\n', delta_r2);

% Other factors
mdl_reduced = fitlme(tbl2, 'DeltaQAB ~ Preceding + Preceding^2 + Timepoint + Age +
SexF + HandLA + Educ + Location + Extent + Extent^2 + (1 | PID)');
lr = 2 * (mdl.LogLikelihood - mdl_reduced.LogLikelihood);
df = mdl.NumEstimatedCoefficients - mdl_reduced.NumEstimatedCoefficients;
pval = 1 - chi2cdf(lr, df);
r2r = 1 - exp(-2 / mdl_reduced.NumObservations * (mdl_reduced.LogLikelihood -
mdl_intercept.LogLikelihood));
delta_r2 = (r2 - r2r) * 100;
fprintf('Effect of stroke type:  $\chi^2$ (%d) = %.2f, p = %.4f, Delta_r2 = %.1f%%\n', df, lr,
pval, delta_r2);

mdl_reduced = fitlme(tbl2, 'DeltaQAB ~ Preceding + Preceding^2 + Timepoint + SexF +
HandLA + Educ + StrHem + Location + Extent + Extent^2 + (1 | PID)');
lr = 2 * (mdl.LogLikelihood - mdl_reduced.LogLikelihood);
df = mdl.NumEstimatedCoefficients - mdl_reduced.NumEstimatedCoefficients;
pval = 1 - chi2cdf(lr, df);
r2r = 1 - exp(-2 / mdl_reduced.NumObservations * (mdl_reduced.LogLikelihood -
mdl_intercept.LogLikelihood));
delta_r2 = (r2 - r2r) * 100;
fprintf('Effect of age:  $\chi^2$ (%d) = %.2f, p = %.4f, Delta_r2 = %.1f%%\n', df, lr, pval,
delta_r2);

mdl_reduced = fitlme(tbl2, 'DeltaQAB ~ Preceding + Preceding^2 + Timepoint + Age +
HandLA + Educ + StrHem + Location + Extent + Extent^2 + (1 | PID)');
lr = 2 * (mdl.LogLikelihood - mdl_reduced.LogLikelihood);
df = mdl.NumEstimatedCoefficients - mdl_reduced.NumEstimatedCoefficients;
pval = 1 - chi2cdf(lr, df);
r2r = 1 - exp(-2 / mdl_reduced.NumObservations * (mdl_reduced.LogLikelihood -
mdl_intercept.LogLikelihood));
delta_r2 = (r2 - r2r) * 100;
fprintf('Effect of sex:  $\chi^2$ (%d) = %.2f, p = %.4f, Delta_r2 = %.1f%%\n', df, lr, pval,
delta_r2);

mdl_reduced = fitlme(tbl2, 'DeltaQAB ~ Preceding + Preceding^2 + Timepoint + Age +
SexF + Educ + StrHem + Location + Extent + Extent^2 + (1 | PID)');
lr = 2 * (mdl.LogLikelihood - mdl_reduced.LogLikelihood);
df = mdl.NumEstimatedCoefficients - mdl_reduced.NumEstimatedCoefficients;
pval = 1 - chi2cdf(lr, df);

```

```
r2r = 1 - exp(-2 / mdl_reduced.NumObservations * (mdl_reduced.LogLikelihood -
mdl_intercept.LogLikelihood));
delta_r2 = (r2 - r2r) * 100;
fprintf('Effect of handedness:  $\chi^2$ (%d) = %.2f, p = %.4f,  $\Delta r^2$  = %.1f%%\n', df, lr,
pval, delta_r2);

mdl_reduced = fitlme(tbl2, 'DeltaQAB ~ Preceding + Preceding^2 + Timepoint + Age +
SexF + HandLA + StrHem + Location + Extent + Extent^2 + (1 | PID)');
lr = 2 * (mdl.LogLikelihood - mdl_reduced.LogLikelihood);
df = mdl.NumEstimatedCoefficients - mdl_reduced.NumEstimatedCoefficients;
pval = 1 - chi2cdf(lr, df);
r2r = 1 - exp(-2 / mdl_reduced.NumObservations * (mdl_reduced.LogLikelihood -
mdl_intercept.LogLikelihood));
delta_r2 = (r2 - r2r) * 100;
fprintf('Effect of education:  $\chi^2$ (%d) = %.2f, p = %.4f,  $\Delta r^2$  = %.1f%%\n', df, lr,
pval, delta_r2);
```
